# Supplementary material for: Aryl hydrocarbon Receptor activation during in vitro and in vivo digestion of raw and cooked broccoli (brassica oleracea var. Italica)
Source: Royal Society of Chemistry journal article supplement (doi:10.1039/d0fo00472c), 2020-01-01
Supplement: d0fo00472c1.pdf [file d0fo00472c1.pdf]

Table S1. Multiple reaction monitoring conditions of metabolites during mass spectrometry.

| Compound              | Precursor ion<br>(m/z) | Product ion<br>(m/z) | Width<br>(m/z) | RT<br>(min) | CE<br>(V) | TL<br>(V) |
|-----------------------|------------------------|----------------------|----------------|-------------|-----------|-----------|
| Tryptophan            | 205.1                  | 1. 91.0              | 0.2            | 3.41        | 1. 39     | 85        |
|                       |                        | 2. 118.1             |                |             | 2. 28     |           |
| Tryptamine            | 161.1                  | 1. 115.0             | 0.2            | 2.30        | 1. 33     | 66        |
|                       |                        | 2. 144.1             |                |             | 2. 14     |           |
| Kynurenine            | 209.0                  | 1. 146.0             | 0.2            | 1.78        | 1. 20     | 90        |
|                       |                        | 2. 192.0             |                |             | 2. 10     |           |
| Indole-3-carbinol     | 130.0                  | 1. 77.0              | 0.2            | 13.15       | 1. 30     | 70        |
|                       |                        | 2. 103.0             |                |             | 2. 21     |           |
| 3,3'-Diindolylmethane | 247.1                  | 1. 77.0              | 0.2            | 13.17       | 1. 52     | 69        |
|                       |                        | 2. 130.1             |                |             | 2. 23     |           |
| Indole-3-lactic acid  | 206.2                  | 1. 118.2             | 0.2            | 9.96        | 1. 23     | 99        |
|                       |                        | 2. 130.2             |                |             | 2. 33     |           |
| Indole-3-aldehyde     | 146.1                  | 1. 118.1             | 0.2            | 10.18       | 1. 16     | 86        |
| Indole-3-acetic acid  | 176.1                  | 1. 103.0             | 0.2            | 10.41       | 1. 31     | 86        |
|                       |                        | 2. 130.1             |                |             | 2. 18     |           |
